# Supplementary material
Source: HighWire-hosted journal article supplement (https://svn.smart01.highwire.org/content/7/5/375)
Supplement: inline-supplementary-material-2 [file inline-supplementary-material-2.pdf]

**Supplemental Table 2:** Change in mRS from 30 to 90 days

| <b>N</b>             | <b>30-day mRS</b> |          |          |          |          |          |          |       |
|----------------------|-------------------|----------|----------|----------|----------|----------|----------|-------|
| 30-day-90-day<br>mRS | <b>0</b>          | <b>1</b> | <b>2</b> | <b>3</b> | <b>4</b> | <b>5</b> | <b>6</b> |       |
| <b>-6 (decline)</b>  | 3                 |          |          |          |          |          |          | 0.2%  |
| <b>-5</b>            |                   | 1        |          |          |          |          |          | 0.1%  |
| <b>-4</b>            | 2                 | 3        |          |          |          |          |          | 0.4%  |
| <b>-3</b>            | 22                | 3        | 1        | 4        |          |          |          | 2.2%  |
| <b>-2</b>            | 16                | 12       | 8        | 4        | 1        |          |          | 3.1%  |
| <b>-1</b>            | 45                | 21       | 27       | 16       | 4        | 3        |          | 8.7%  |
| <b>0</b>             | 394               | 132      | 72       | 117      | 33       | 12       | 9        | 57.4% |
| <b>1</b>             |                   | 80       | 56       | 41       | 39       | 13       |          | 17.1% |
| <b>2</b>             |                   |          | 55       | 30       | 9        | 10       |          | 7.8%  |
| <b>3</b>             |                   |          |          | 35       | 1        | 1        |          | 2.8%  |
| <b>4</b>             |                   |          |          |          | 3        |          |          | 0.2%  |
| <b>5 (improve)</b>   |                   |          |          |          |          | 1        |          | 0.1%  |
